# Supplementary material
Source: ML conference proceedings conference paper supplement (https://proceedings.neurips.cc/paper_files/paper/2019/hash/5d2c2cee8ab0b9a36bd1ed7196bd6c4a-Abstract.html)
Supplement: Supplementary file [file 5d2c2cee8ab0b9a36bd1ed7196bd6c4a-Supplemental.zip]

---

# Copula Multi-label Learning (Supplementary)

---

**Weiwei Liu**

School of Computer Science, Wuhan University  
Wuhan, China 430072  
liuweiwei863@gmail.com

## Abstract

In this supplementary file, we first present the proofs of some important propositions, lemmas and theorems in the main paper. After that, we present more experiment results.

## 1 Assumptions

**Assumption A.** For  $j \in \{1, \dots, p\}$ ,

$$\hat{F}_j(x_j) = \frac{\sum_{i=1}^n I(x_j^{(i)} \leq x_j)}{n} + o_p(n^{-1/2})$$

**Assumption B.** For  $j \in \{1, \dots, q\}$ ,

$$\hat{\theta}_j - \theta_j^* = \frac{\sum_{i=1}^n \psi_i}{n} + o_p(n^{-1/2})$$

where  $\psi_i = \psi(\mathfrak{F}_j(y_j^{(i)}), F_1(x_1^{(i)}), \dots, F_p(x_p^{(i)}); \theta_j^*)$  is a  $d$ -dimensional random vector such that  $E(\psi) = (0, \dots, 0)'$  and  $E\|\psi\|_2^2 < \infty$ .

**Assumption C.** (i)  $\dot{c}$  and  $c_a$ ,  $a \in \{1, \dots, p+1\}$ , are continuous.

(ii)  $E|y_j| < \infty$  for  $j \in \{1, \dots, q\}$ .

(iii)  $E(y_j c_a(\mathfrak{F}_j(y_j), F_1(x_1), \dots, F_p(x_p); \theta_j^*))^2 < \infty$  and  $E(y_j c(\mathfrak{F}_j(y_j), F_1(x_1), \dots, F_p(x_p); \theta_j^*))^2 < \infty$  for  $j \in \{1, \dots, q\}$  and  $a \in \{1, \dots, p+1\}$ .

(iv)  $E(y_j \frac{\partial c(\mathfrak{F}_j(y_j), F_1(x_1), \dots, F_p(x_p); \theta_j^*)}{\partial \theta_b})^2 < \infty$  for  $j \in \{1, \dots, q\}$  and  $b \in \{1, \dots, d\}$ .

## 2 Proof of Proposition 1

**Proposition 1.** If  $p = 1$  or  $x_1, \dots, x_p$  are mutually independent, Eq.(2) of the main paper reduces to  $\Xi_j(x) = \vartheta_j(F_1(x_1), \dots, F_p(x_p))$ ,  $\forall j \in \{1, \dots, q\}$ .

*Proof.* For  $j \in \{1, \dots, q\}$ , if  $p = 1$ ,  $C(1, u_1) = P(\mathfrak{F}_j(y_j) \leq 1, F_1(x_1) \leq u_1) = P(F_1(x_1) \leq u_1)$ . The CDF of a continuous variable has the uniform distribution, so  $C(1, u_1) = u_1$  and  $c_x(u_1) = 1$ . If  $x_1, \dots, x_p$  are mutually independent,  $C(1, u_1, \dots, u_p) = P(\mathfrak{F}_j(y_j) \leq 1, F_1(x_1) \leq u_1, \dots, F_p(x_p) \leq u_p) = P(F_1(x_1) \leq u_1) \times \dots \times P(F_p(x_p) \leq u_p) = u_1 \times \dots \times u_p$ , so  $c_x(F_1(x_1), \dots, F_p(x_p)) = 1$ .  $\square$

### 3 Proof of Lemma 1

**Lemma 1.** For  $j \in \{1, \dots, q\}$ , suppose that Assumption C holds, if  $\widehat{F}_1(x_1) = F_1(x_1) + O_p(n^{-1/2})$ , and  $\widehat{\theta}_j = \theta_j^* + O_p(n^{-1/2})$ , then we have

$$\begin{aligned} & \widehat{\Xi}_j(x_1) - \frac{\sum_{i=1}^n y_j^{(i)} c(\mathfrak{F}_j(y_j^{(i)}), F_1(x_1); \theta_j^*)}{n} \\ &= 1/n \sum_{i=1}^n y_j^{(i)} (\widehat{\mathfrak{F}}_j(y_j^{(i)}) - \mathfrak{F}_j(y_j^{(i)})) c_1(\mathfrak{F}_j(y_j^{(i)}), F_1(x_1); \theta_j^*) \\ &+ (\widehat{F}_1(x_1) - F_1(x_1)) \vartheta_{j,1}(F_1(x_1); \theta_j^*) + (\widehat{\theta}_j - \theta_j^*)' \dot{\vartheta}_j(F_1(x_1); \theta_j^*) + o_p(n^{-1/2}). \end{aligned}$$

*Proof.* Given  $j \in \{1, \dots, q\}$ , using Taylor expansion, we have

$$\widehat{\Xi}_j(x_1) = \frac{\sum_{i=1}^n y_j^{(i)} c(\mathfrak{F}_j(y_j^{(i)}), F_1(x_1); \theta_j^*)}{n} + \Lambda_1 + \Lambda_2 + \Lambda_3 \quad (1)$$

where

$$\begin{aligned} \Lambda_1 &= 1/n \sum_{i=1}^n y_j^{(i)} (\widehat{\mathfrak{F}}_j(y_j^{(i)}) - \mathfrak{F}_j(y_j^{(i)})) c_1(\widetilde{u}_{i,j}, \widetilde{u}_1; \widetilde{\theta}_j) \\ \Lambda_2 &= 1/n \sum_{i=1}^n y_j^{(i)} (\widehat{F}_1(x_1) - F_1(x_1)) c_2(\widetilde{u}_{i,j}, \widetilde{u}_1; \widetilde{\theta}_j) \\ \Lambda_3 &= 1/n \sum_{i=1}^n y_j^{(i)} (\widehat{\theta}_j - \theta_j^*)' \dot{c}(\widetilde{u}_{i,j}, \widetilde{u}_1; \widetilde{\theta}_j) \end{aligned}$$

with  $\widetilde{u}_{i,j} = \mathfrak{F}_j(y_j^{(i)}) + t(\widehat{\mathfrak{F}}_j(y_j^{(i)}) - \mathfrak{F}_j(y_j^{(i)}))$ ,  $\widetilde{u}_1 = F_1(x_1) + t(\widehat{F}_1(x_1) - F_1(x_1))$  and  $\widetilde{\theta}_j = \theta_j^* + t(\widehat{\theta}_j - \theta_j^*)$  for some  $t \in [0, 1]$ .  $\Lambda_1$  can be represented as

$$\Lambda_1 = 1/n \sum_{i=1}^n y_j^{(i)} (\widehat{\mathfrak{F}}_j(y_j^{(i)}) - \mathfrak{F}_j(y_j^{(i)})) \times c_1(\mathfrak{F}_j(y_j^{(i)}), F_1(x_1); \theta_j^*) + R_1$$

where

$$R_1 = 1/n \sum_{i=1}^n y_j^{(i)} (\widehat{\mathfrak{F}}_j(y_j^{(i)}) - \mathfrak{F}_j(y_j^{(i)})) (c_1(\widetilde{u}_{i,j}, \widetilde{u}_1; \widetilde{\theta}_j) - c_1(\mathfrak{F}_j(y_j^{(i)}), F_1(x_1); \theta_j^*))$$

Assumption C.(ii) shows that  $E|y_j| < \infty$ . We get that  $|y_j|$  has a constant upper bound, so  $1/n \sum_{i=1}^n |y_j^{(i)}| = O_p(1)$ . From De Moivre's theorem [1], we obtain that  $\widehat{p}_j(0) - p_j(0) = O_p(n^{-1/2})$  and  $\widehat{p}_j(1) - p_j(1) = O_p(n^{-1/2})$ , so  $\sup_{y_j} |\widehat{\mathfrak{F}}_j(y_j) - \mathfrak{F}_j(y_j)| = O_p(n^{-1/2})$ . By Assumption C.(i) and the continuous mapping theorem [2], we have  $\sup_i |c_1(\widetilde{u}_{i,j}, \widetilde{u}_1; \widetilde{\theta}_j) - c_1(\mathfrak{F}_j(y_j^{(i)}), F_1(x_1); \theta_j^*)| = o_p(1)$ . Then we have

$$\begin{aligned} |R_1| &\leq 1/n \sum_{i=1}^n |y_j^{(i)}| \sup_{y_j} |\widehat{\mathfrak{F}}_j(y_j^{(i)}) - \mathfrak{F}_j(y_j^{(i)})| \sup_i |c_1(\widetilde{u}_{i,j}, \widetilde{u}_1; \widetilde{\theta}_j) - c_1(\mathfrak{F}_j(y_j^{(i)}), F_1(x_1); \theta_j^*)| \\ &\leq O_p(1) O_p(n^{-1/2}) o_p(1) = o_p(n^{-1/2}) \end{aligned}$$

Thus, we obtain

$$\Lambda_1 = 1/n \sum_{i=1}^n y_j^{(i)} (\widehat{\mathfrak{F}}_j(y_j^{(i)}) - \mathfrak{F}_j(y_j^{(i)})) c_1(\mathfrak{F}_j(y_j^{(i)}), F_1(x_1); \theta_j^*) + o_p(n^{-1/2}) \quad (2)$$

Similarly, if  $\widehat{F}_1(x_1) = F_1(x_1) + O_p(n^{-1/2})$ , we have

$$\Lambda_2 = 1/n \sum_{i=1}^n y_j^{(i)} (\widehat{F}_1(x_1) - F_1(x_1)) c_2(\mathfrak{F}_j(y_j^{(i)}), F_1(x_1); \theta_j^*) + o_p(n^{-1/2})$$

Using Assumption C.(iii) and weak law of large numbers (WLLN) [1], we know that  $\frac{\sum_{i=1}^n y_j^{(i)} c_2(\mathfrak{F}_j(y_j^{(i)}), F_1(x_1); \theta_j^*)}{n} \xrightarrow{P} E(y_j c_2(\mathfrak{F}_j(y_j), F_1(x_1); \theta_j^*)) = \vartheta_{j,1}(F_1(x_1); \theta_j^*)$ , so we obtain

$$\Lambda_2 = (\widehat{F}_1(x_1) - F_1(x_1))\vartheta_{j,1}(F_1(x_1); \theta_j^*) + o_p(n^{-1/2}) \quad (3)$$

Using  $\widehat{\theta}_j = \theta_j^* + O_p(n^{-1/2})$ , Assumption C.(iv) and WLLN again, we have

$$\begin{aligned} \Lambda_3 &= 1/n \sum_{i=1}^n y_j^{(i)} (\widehat{\theta}_j - \theta_j^*)' \dot{c}(\mathfrak{F}_j(y_j^{(i)}), F_1(x_1); \theta_j^*) + o_p(n^{-1/2}) \\ &= (\widehat{\theta}_j - \theta_j^*)' \dot{\vartheta}_j(F_1(x_1); \theta_j^*) + o_p(n^{-1/2}) \end{aligned} \quad (4)$$

Combining Eq.(1), Eq.(2), Eq.(3) and Eq.(4) implies the result.  $\square$

We first consider the simple case where  $p = 1$ . Proposition 1 shows that  $\Xi_j(x_1) = \vartheta_j(F_1(x_1); \theta_j^*) = E(y_j c(\mathfrak{F}_j(y_j), F_1(x_1); \theta_j^*))$  can be estimated by  $\widehat{\Xi}_j(x_1) = \frac{\sum_{i=1}^n y_j^{(i)} c(\mathfrak{F}_j(y_j^{(i)}), \widehat{F}_1(x_1); \widehat{\theta}_j)}{n}$ . We first provide the following Lemma.

## 4 Proof of Theorem 2

**Theorem 2.** Given  $p = 1$ , under Assumptions A, B and the conditions of Lemma 1, for  $j \in \{1, \dots, q\}$ ,  $\widehat{\Xi}_j(x_1)$  is an unbiased and consistent estimator for  $\Xi_j(x_1)$ .

*Proof.* For  $j \in \{1, \dots, q\}$ , from Lemma 1, we know that

$$\begin{aligned} E(\widehat{\Xi}_j(x_1)) &= E\left(\frac{\sum_{i=1}^n y_j^{(i)} c(\mathfrak{F}_j(y_j^{(i)}), F_1(x_1); \theta_j^*)}{n}\right) \\ &\quad + E\left(1/n \sum_{i=1}^n y_j^{(i)} (\widehat{\mathfrak{F}}_j(y_j^{(i)}) - \mathfrak{F}_j(y_j^{(i)})) c_1(\mathfrak{F}_j(y_j^{(i)}), F_1(x_1); \theta_j^*)\right) \\ &\quad + E\left((\widehat{F}_1(x_1) - F_1(x_1))\vartheta_{j,1}(F_1(x_1); \theta_j^*)\right) + E\left((\widehat{\theta}_j - \theta_j^*)' \dot{\vartheta}_j(F_1(x_1); \theta_j^*)\right) \end{aligned} \quad (5)$$

Now, we deal with each term in the right side of Eq.(5).

$$E\left(\frac{\sum_{i=1}^n y_j^{(i)} c(\mathfrak{F}_j(y_j^{(i)}), F_1(x_1); \theta_j^*)}{n}\right) = E(y_j c(\mathfrak{F}_j(y_j), F_1(x_1); \theta_j^*)) = \Xi_j(x_1)$$

If  $-0.5 \leq y_j \leq 0.5$ , using the law of total expectation, we obtain that

$$\begin{aligned} &E\left(y_j (\widehat{\mathfrak{F}}_j(y_j) - \mathfrak{F}_j(y_j)) c_1(\mathfrak{F}_j(y_j), F_1(x_1); \theta_j^*)\right) \\ &= E\left[E\left(y_j (\widehat{\mathfrak{F}}_j(y_j) - \mathfrak{F}_j(y_j)) c_1(\mathfrak{F}_j(y_j), F_1(x_1); \theta_j^*) | y_j\right)\right] \\ &= E\left[E\left(y_j \left(\frac{\sum_{a=1}^n I(y_j^a = 0)}{n} (y_j + 0.5) - \mathfrak{F}_j(y_j)\right) c_1(\mathfrak{F}_j(y_j), F_1(x_1); \theta_j^*) | y_j\right)\right] \\ &= E\left[y_j \left(p_j(0)(y_j + 0.5) - \mathfrak{F}_j(y_j)\right) c_1(\mathfrak{F}_j(y_j), F_1(x_1); \theta_j^*)\right] = 0 \end{aligned}$$

If  $0.5 < y_j \leq 1.5$ , similarly, we obtain that  $E\left(y_j (\widehat{\mathfrak{F}}_j(y_j) - \mathfrak{F}_j(y_j)) c_1(\mathfrak{F}_j(y_j), F_1(x_1); \theta_j^*)\right) = 0$ .

Using Assumptions A and B, we obtain that  $E\left((\widehat{F}_1(x_1) - F_1(x_1))\vartheta_{j,1}(F_1(x_1); \theta_j^*)\right) = 0$  and  $E\left((\widehat{\theta}_j - \theta_j^*)' \dot{\vartheta}_j(F_1(x_1); \theta_j^*)\right) = 0$ . Thus,  $E(\widehat{\Xi}_j(x_1)) = \Xi_j(x_1)$ , and from Assumption C.(iii) and WLLN, we know that  $\widehat{\Xi}_j(x_1)$  is an unbiased and consistent estimator for  $\Xi_j(x_1)$ .  $\square$

Table 1: The results of Hamming Loss on the various data sets (mean  $\pm$  standard deviation). The best ones are in bold.

| DATA SET | BR                  | CC                  | CCA                 | CPLST               | CML+GAU                    | CML+ST                     |
|----------|---------------------|---------------------|---------------------|---------------------|----------------------------|----------------------------|
| EMOTIONS | 0.2628 $\pm$ 0.0155 | 0.2590 $\pm$ 0.0214 | 0.2607 $\pm$ 0.0408 | 0.2575 $\pm$ 0.0448 | <b>0.2435</b> $\pm$ 0.0208 | 0.2500 $\pm$ 0.0213        |
| SCENE    | 0.1483 $\pm$ 0.0109 | 0.1367 $\pm$ 0.0078 | 0.1342 $\pm$ 0.0538 | 0.1331 $\pm$ 0.0321 | <b>0.1315</b> $\pm$ 0.0073 | 0.1333 $\pm$ 0.0101        |
| MEDICAL  | 0.1293 $\pm$ 0.0076 | 0.1292 $\pm$ 0.0166 | 0.1259 $\pm$ 0.0578 | 0.1273 $\pm$ 0.0288 | 0.1250 $\pm$ 0.0174        | <b>0.1170</b> $\pm$ 0.0070 |
| YEAST    | 0.2586 $\pm$ 0.0186 | 0.2521 $\pm$ 0.0142 | 0.2558 $\pm$ 0.0213 | 0.2472 $\pm$ 0.0093 | <b>0.2403</b> $\pm$ 0.0036 | 0.2467 $\pm$ 0.0226        |
| ENRON    | 0.0659 $\pm$ 0.0031 | 0.0655 $\pm$ 0.0019 | 0.0642 $\pm$ 0.0220 | 0.0637 $\pm$ 0.0051 | 0.0626 $\pm$ 0.0062        | <b>0.0613</b> $\pm$ 0.0042 |

Table 2: The results of Micro-F1 on the various data sets (mean  $\pm$  standard deviation). The best ones are in bold.

| DATA SET | BR                  | CC                  | CCA                 | CPLST               | CML+GAU                    | CML+ST                     |
|----------|---------------------|---------------------|---------------------|---------------------|----------------------------|----------------------------|
| EMOTIONS | 0.5605 $\pm$ 0.0222 | 0.5651 $\pm$ 0.0359 | 0.5612 $\pm$ 0.0228 | 0.5716 $\pm$ 0.0588 | <b>0.5794</b> $\pm$ 0.0362 | 0.5744 $\pm$ 0.0400        |
| SCENE    | 0.5966 $\pm$ 0.0518 | 0.6004 $\pm$ 0.0214 | 0.6021 $\pm$ 0.0282 | 0.6026 $\pm$ 0.0691 | <b>0.6118</b> $\pm$ 0.0267 | 0.6022 $\pm$ 0.0150        |
| MEDICAL  | 0.2475 $\pm$ 0.0940 | 0.2491 $\pm$ 0.0127 | 0.2556 $\pm$ 0.0628 | 0.2551 $\pm$ 0.0415 | 0.2568 $\pm$ 0.0215        | <b>0.2582</b> $\pm$ 0.0595 |
| YEAST    | 0.5761 $\pm$ 0.0206 | 0.5853 $\pm$ 0.0291 | 0.5778 $\pm$ 0.0212 | 0.5885 $\pm$ 0.0372 | <b>0.5962</b> $\pm$ 0.0042 | 0.5862 $\pm$ 0.0308        |
| ENRON    | 0.1863 $\pm$ 0.0494 | 0.1909 $\pm$ 0.0190 | 0.1877 $\pm$ 0.0690 | 0.1922 $\pm$ 0.0358 | 0.1943 $\pm$ 0.0124        | <b>0.1961</b> $\pm$ 0.0289 |

## 5 Proof of Theorem 6

**Theorem 6.** Given  $p = 1$ . Suppose that Assumptions A, B and the conditions of Lemma 1 hold. For  $j \in \{1, \dots, q\}$ , assume that the density function of  $y_j$ ,  $\Upsilon_j(y_j) \leq \Upsilon_{max} < \infty$  and  $c(\widehat{\mathfrak{F}}_j(y_j), \widehat{F}_1(x_1)) \leq c_{max} < \infty$ , then we have

$$MSE_j(x_1) \leq \frac{7\Upsilon_{max}c_{max}^2}{6n}$$

*Proof.* For  $j \in \{1, \dots, q\}$ , set

$$\kappa_{i,j} = y_j^{(i)} c(\widehat{\mathfrak{F}}_j(y_j^{(i)}), \widehat{F}_1(x_1)) - E(y_j^{(i)} c(\widehat{\mathfrak{F}}_j(y_j^{(i)}), \widehat{F}_1(x_1)))$$

Then  $\kappa_{i,j}$ ,  $i = 1, \dots, n$ , are  $n$  i.i.d. random variables with zero mean and variance

$$\begin{aligned} E(\kappa_{i,j}^2) &\leq E\left((y_j^{(i)} c(\widehat{\mathfrak{F}}_j(y_j^{(i)}), \widehat{F}_1(x_1)))^2\right) \leq c_{max}^2 E(y_j^{(i)})^2 \\ &\leq c_{max}^2 \int (y_j)^2 \Upsilon_j(y_j) dy_j \leq \frac{7c_{max}^2 \Upsilon_{max}}{6} \end{aligned}$$

Then, we obtain

$$MSE_j(x_1) = \sigma_j^2(x_1) = E\left(\left(\frac{\sum_{i=1}^n \kappa_{i,j}}{n}\right)^2\right) = \frac{E(\kappa_{i,j}^2)}{n} \leq \frac{7c_{max}^2 \Upsilon_{max}}{6n}$$

□

## 6 More Results

This section shows more experiment results. Tables 1 and 2 list the Hamming Loss and Micro-F1 results for our methods and baseline approaches in respect of the different data sets. From Tables 1 and 2, we can see that our proposed methods achieve the best performance.

## References

- [1] William Feller. *An Introduction to Probability Theory and Its Applications*. Wiley, 1968.
- [2] Henry Berthold Mann and Abraham Wald. On stochastic limit and order relationships. *Annals of Mathematical Statistics*, 14(3):217–226, 1943.
